# Supplementary material
Source: publisher figshare collection journal article supplement (https://tandf.figshare.com/ndownloader/files/21211593)
Supplement: Supplementary file 1 [file 21211593]

|  |  | Nest traits | | | | | | | | | | | | | | | | | | | |
| --- | --- | --- | --- | --- | --- | --- | --- | --- | --- | --- | --- | --- | --- | --- | --- | --- | --- | --- | --- | --- | --- |
| Status | Species | Nest width 1 Average | Nest width 1 SD | Nest width 2 Average | Nest width Min | Nest width Max | Nest height Average | Nest height SD | Nest height Min | Nest height  Max | Nest depth Average | Nest depth SD | Nest depth Min | Nest depth Max | Inside diameter of the nest 1 Average | Inside diameter of the nest 1 SD | Inside diameter of the nest 2 Average | Inside diameter of the nest Min | Inside diameter of the nest Max | Reference | Unit |
| Migratory | *Catharus bicknelli (Average)* | 11.86666667 | 1.8 |  | 7.65 | 15.05 | 8.35 | 1.9 | 4.35 | 11.8 | 4.5 | 0.9 | 2.9 | 6.45 | 6.566666667 | 1.3 |  | 5.55 | 10.35 |  | cm |
| Migratory | *Catharus bicknelli* | 11.5 |  | 12.8 | 10.3 | 14.1 | 8.6 |  | 7.1 | 9.6 | 4.6 |  | 3.8 | 6.4 | 6.3 |  | 6.3 | 5.8 | 8.7 | Wallace 1939 | cm |
| Migratory | *Catharus bicknelli* | 11.3 | 1.8 |  | 5 | 16 | 8.1 | 1.9 | 1.6 | 14 | 4.4 | 0.9 | 2 | 6.5 | 7.1 | 1.3 |  | 5.3 | 12 | Rimmer, Christopher C., Kent P. McFarland,  Walter G. Ellison, and James E. Goetz 2015 (In Birds of North America, Rodewald 2015) | cm |
| Migratory | *Catharus fuscescens (Average)* |  |  |  | 8 | 15 |  |  | 8.8 | 14.3 |  |  | 3.3 | 6 |  |  |  | 6 | 7.5 |  | cm |
| Migratory | *Catharus fuscescens* |  |  |  | 8 | 15 |  |  | 8.8 | 14.3 |  |  | 3.3 | 6 |  |  |  | 6 | 7.5 | Peck and James 1987 (In Birds of North America, Rodewald 2015) | cm |
| Migratory | *Catharus fuscescens* |  |  |  |  |  |  |  |  |  |  |  |  |  |  |  |  |  |  |  |  |
| Migratory | *Catharus guttatus (Average)* |  |  |  | 10 | 15 |  |  | 5 | 8 |  |  | 3.5 | 5.5 |  |  |  | 6 | 7 |  | cm |
| Migratory | *Catharus guttatus auduboni* |  |  |  | 10 | 15 |  |  | 5 | 8 |  |  | 3.5 | 5.5 |  |  |  | 6 | 7 | Peck and James 1987, Todd 1940 (In Birds of North America, Rodewald 2015) | cm |
| Migratory | *Catharus guttatus sequoiensis* |  |  |  |  |  |  |  |  |  |  |  |  |  |  |  |  |  |  |  |  |
| Migratory | *Catharus guttatus faxoni* |  |  |  |  |  |  |  |  |  |  |  |  |  |  |  |  |  |  |  |  |
| Migratory | *Catharus guttatus guttatus* |  |  |  |  |  |  |  |  |  |  |  |  |  |  |  |  |  |  |  |  |
| Migratory | *Catharus guttatus nanus* |  |  |  |  |  |  |  |  |  |  |  |  |  |  |  |  |  |  |  |  |
| Migratory | *Catharus guttatus slevini* |  |  |  |  |  |  |  |  |  |  |  |  |  |  |  |  |  |  |  |  |
| Migratory | *Catharus guttatus polionotus* |  |  |  |  |  |  |  |  |  |  |  |  |  |  |  |  |  |  |  |  |
| Migratory | *Catharus minimus* |  |  |  | 11 | 13 |  |  | 7 | 10 |  |  | 5 | 5 |  |  |  | 6 | 7 | Brandt 1943 (In Birds of North America, Rodewald 2015) | cm |
| Migratory | *Catharus ustulatus* | 10.6 | 1.32 |  | 9.4 | 15.4 | 8.2 | 1.7 | 3.8 | 10.5 | 3.8 | 0.98 | 2.5 | 6 | 6 | 0.85 |  | 5 | 8.5 | K. McFarland et al. unpubl. (In Birds of North America, Rodewald 2015) | cm |
| Resident | *Catharus dryas* |  |  |  | 8.44 | 14.62 |  |  | 8.1 | 14.53 |  |  | 4.25 | 8.24 |  |  |  | 5.27 | 8.92 |  |  |
| Resident | *Catharus aurantiirostris* |  |  |  |  |  |  |  |  |  |  |  |  |  |  |  |  |  |  |  |  |
| Resident | *Catharus gracilirostris* |  |  |  |  |  |  |  |  |  |  |  |  |  |  |  |  |  |  |  |  |
| Resident | *Catharus fuscater* |  |  |  | 10.6 |  |  |  | 21 |  |  |  | 6 |  |  |  |  | 7.1 |  | Beltrán and Kattan 2001 | cm |
| Resident | *Catharus occidentalis* |  |  |  |  |  |  |  |  |  |  |  |  |  |  |  |  |  |  |  |  |
| Resident | *Catharus frantzii* |  |  |  | 13.97 | 15.24 |  |  | 8.89 | 8.89 |  |  | 4.76 | 5.71 |  |  |  | 5.71 | 7.62 | Skutch 1960 | cm |
| Resident | *Catharus mexicanus* |  |  |  |  |  |  |  |  |  |  |  |  |  |  |  |  |  |  |  |  |

|  |  | Egg traits | | | | | | | | | |  | | |  | |
| --- | --- | --- | --- | --- | --- | --- | --- | --- | --- | --- | --- | --- | --- | --- | --- | --- |
| Status | Species | Egg length Average | Egg length SD | Egg length Min | Egg length Max | Egg breadth Average | Egg breadth SD | Egg breadth Min | Egg breadth Max | Unit | Reference | Mass Average | Mass SD | Mass Min | Mass Max | Reference |
| Migratory | *Catharus bicknelli (Average)* | 22.15 | 0.8 | 20.75 | 23.3 | 16.45 | 1.6 | 14.2 | 17.5 | mm |  |  |  |  |  |  |
| Migratory | *Catharus bicknelli* | 21.9 |  | 21 | 23 | 16.6 |  | 16 | 17.5 | mm | Wallace 1939 | NA | Na | Na |  |  |
| Migratory | *Catharus bicknelli* | 22.4 | 0.8 | 20.5 | 23.6 | 16.3 | 1.6 | 12.4 | 17.5 | mm | Rimmer, Christopher C., Kent P. McFarland, Walter G. Ellison,  and James E. Goetz 2015 (In Birds of North America, Rodewald 2015) | NA | Na | Na |  |  |
| Migratory | *Catharus fuscescens (Average)* | 22.65 |  | 20.58 | 25.27 | 16.8 |  | 15.92 | 18.045 | mm |  | 2.98 |  |  |  |  |
| Migratory | *Catharus fuscescens* | 22.9 |  | 20.56 | 24.84 | 16.9 |  | 16.04 | 18.09 | mm | Western Foundation Vertebrate Zoology [WFVZ] (In Birds of North America, Rodewald 2015) | 2.98 | Na | Na |  | Meyer 1916 (In  Birds of North  America,  Rodewald 2015) |
| Migratory | *Catharus fuscescens* | 22.4 |  | 20.6 | 25.7 | 16.7 |  | 15.8 | 18 | mm | Tyler 1949 (In Birds of North America, Rodewald 2015) | NA | Na | Na |  |  |
| Migratory | *Catharus guttatus (Average)* | 22.59666667 |  | 20.13333333 | 24.66666667 | 16.92333333 |  | 15.75333333 | 18.06 | mm |  | 3.684285714 | 0.44113 | 3.26 | 4.39 |  |
| Migratory | *Catharus guttatus auduboni* | 22.72 |  | 19.65 | 24.29 | 16.95 |  | 15.59 | 18 | mm | Western Foundation Vertebrate Zoology [WFVZ] (In Birds of North America, Rodewald 2015) | 3.684285714 | 0.44113 | 3.26 | 4.39 | Bent 1949 |
| Migratory | *Catharus guttatus sequoiensis* | 22.25 |  | 20.2 | 24.68 | 16.79 |  | 15.41 | 17.9 | mm | Western Foundation Vertebrate Zoology [WFVZ] (In Birds of North America, Rodewald 2015) | Na | Na | Na |  | Na |
| Migratory | *Catharus guttatus faxoni* | 22.82 |  | 20.55 | 25.03 | 17.03 |  | 16.26 | 18.28 | mm | Western Foundation Vertebrate Zoology [WFVZ] (In Birds of North America, Rodewald 2015) | Na | Na | Na |  | Na |
| Migratory | *Catharus guttatus guttatus* |  |  |  |  |  |  |  |  |  |  |  |  |  |  |  |
| Migratory | *Catharus guttatus nanus* |  |  |  |  |  |  |  |  |  |  |  |  |  |  |  |
| Migratory | *Catharus guttatus slevini* |  |  |  |  |  |  |  |  |  |  |  |  |  |  |  |
| Migratory | *Catharus guttatus polionotus* |  |  |  |  |  |  |  |  |  |  |  |  |  |  |  |
| Migratory | *Catharus minimus* | 23 |  | 20.6 | 24.9 | 17 |  | 15.8 | 19.8 | mm | Bent 1949 | NA | NA | NA |  | NA |
| Migratory | *Catharus ustulatus* | 23.19 |  | 20.2 | 25.7 | 16.66 |  | 15.27 | 18.07 | mm | Western Foundation Vertebrate Zoology [WFVZ] (In Birds of North America, Rodewald 2015) | NA | NA | NA |  | NA |
| Resident | *Catharus dryas* |  |  | 22.8 | 26.9 |  |  | 15.5 | 19.3 |  |  |  |  |  |  |  |
| Resident | *Catharus aurantiirostris* | 23.7 |  | 21.8 | 26.2 | 17.5 |  | 16.7 | 18.3 |  | Skutch 1960; Skutch 1945 |  |  |  |  |  |
| Resident | *Catharus gracilirostris* |  |  |  |  |  |  |  |  |  |  |  |  |  |  |  |
| Resident | *Catharus fuscater* | 25.37 |  | 24.7 | 26.8 | 17.6 |  | 16.4 | 18.3 |  | Carriker 1910; Beltrán and Kattan 2001; E.A. Goldman in Wetmore et al. 1984 |  |  |  |  |  |
| Resident | *Catharus occidentalis* | 23.52 |  |  |  | 16.89 |  |  |  |  | Rowley 1984 |  |  |  |  |  |
| Resident | *Catharus frantzii* | 24.3 |  | 23.4 | 25.5 | 18.2 |  | 17.2 | 19.1 |  | Skutch 1945; Skutch 1960; Carriker 1910; Rowley 1984 |  |  |  |  |  |
| Resident | *Catharus mexicanus* |  |  |  |  |  |  |  |  |  |  |  |  |  |  |  |

|  |  | Clutch size | | | | |
| --- | --- | --- | --- | --- | --- | --- |
| Status | Species | Clutch size Average | Clutch size SD | Clutch size Min | Clutch size Max | Reference |
| Migratory | *Catharus bicknelli (Average)* | 3.531 | 0.504 | 3.000 | 4.000 |  |
| Migratory | *Catharus bicknelli* | 3.462 | 0.5189 | 3 | 4 | Wallace 1939 |
| Migratory | *Catharus bicknelli* | 3.6 | 0.49 | 3 | 4 | Rimmer, Christopher C., Kent P. McFarland, Walter G. Ellison, and James E. Goetz 2015 (In Birds of North America, Rodewald 2015) |
| Migratory | *Catharus fuscescens (Average)* |  |  | 4 | 5 |  |
| Migratory | *Catharus fuscescens* |  |  | 4 | 5 | Peck and James 1987 (In Birds of North America, Rodewald 2015) |
| Migratory | *Catharus fuscescens* |  |  |  |  |  |
| Migratory | *Catharus guttatus (Average)* | 3.81 |  | 3 | 6 | Handbook of birds of the world, volume 10 (Collar et al. 2005); Boyce and Martin 2017 |
| Migratory | *Catharus guttatus auduboni* |  |  |  |  |  |
| Migratory | *Catharus guttatus sequoiensis* |  |  |  |  |  |
| Migratory | *Catharus guttatus faxoni* |  |  |  |  |  |
| Migratory | *Catharus guttatus guttatus* |  |  |  |  |  |
| Migratory | *Catharus guttatus nanus* |  |  |  |  |  |
| Migratory | *Catharus guttatus slevini* |  |  |  |  |  |
| Migratory | *Catharus guttatus polionotus* |  |  |  |  |  |
| Migratory | *Catharus minimus* | 4 | 0.6 | 3 | 5 | BK |
| Migratory | *Catharus ustulatus* |  |  | 4 | 5 | Campbell et al. 1997, Evans et al. 1998, CNRP, WFVZ (In Birds of North America, Rodewald 2015) |
| Resident | *Catharus dryas* | 2 |  | 2 | 2 |  |
| Resident | *Catharus aurantiirostris* | 1.97 |  | 2 | 3 | Skutch 1960; Skutch 1945; Boyce and Martin 2017 |
| Resident | *Catharus gracilirostris* |  |  | 2 | 2 | Sánchez-M 2019; Collar 2019 |
| Resident | *Catharus fuscater* | 1.96 |  | 1 | 2 | Halley 2014; Beltrán and Kattan 2001; Collar 2019; Boyce and Martin 2017 |
| Resident | *Catharus occidentalis* |  |  | 2 | 3 | Collar 2019; Rowley 1984; Soberanes-González et al. 2012 |
| Resident | *Catharus frantzii* |  |  | 2 | 2 | Skutch 1945; Skutch 1960; Collar 2019 |
| Resident | *Catharus mexicanus* |  |  | 2 | 3 | Collar 2019 |

|  |  | Incubation period | | | | |
| --- | --- | --- | --- | --- | --- | --- |
| Status | Species | Incubation period Average | Incubation period SD | Incubation period Min | Incubation period Max | Reference |
| Migratory | *Catharus bicknelli (Average)* | 12 | 1.6 | 11 | 14 |  |
| Migratory | *Catharus bicknelli* | 12 | 1.6 | 9 | 14 | Wallace 1939 |
| Migratory | *Catharus bicknelli* | NA | NA | 13 | 14 | Y. Aubry unpubl. (In Birds of North America, Rodewald 2015) |
| Migratory | *Catharus fuscescens (Average)* |  |  | 10 | 14 |  |
| Migratory | *Catharus fuscescens* | NA |  | 10 | 14 | Peck and James 1987 (In Birds of North America, Rodewald 2015) |
| Migratory | *Catharus fuscescens* |  |  |  |  |  |
| Migratory | *Catharus guttatus (Average)* | 12.56 |  | 11 | 13 |  |
| Migratory | *Catharus guttatus auduboni* |  |  | 11 | 13 | Bent 1949, (Peck and James 1987, Martin 1995; In Birds of North America, Rodewald 2015) |
| Migratory | *Catharus guttatus sequoiensis* |  |  |  |  |  |
| Migratory | *Catharus guttatus faxoni* |  |  |  |  |  |
| Migratory | *Catharus guttatus guttatus* |  |  |  |  |  |
| Migratory | *Catharus guttatus nanus* |  |  |  |  |  |
| Migratory | *Catharus guttatus slevini* |  |  |  |  |  |
| Migratory | *Catharus guttatus polionotus* |  |  |  |  |  |
| Migratory | *Catharus minimus* | 12.66666667 | 0.577350269 | 12 | 13 | Jehl and Hussell 1966, Baldwin 1955 (In Birds of North America, Rodewald 2015) |
| Migratory | *Catharus ustulatus* |  |  | 10 | 14 | Campbell et al. 1997, Evans et al. 1998 |
| Resident | *Catharus dryas* |  |  | 13 | 15 |  |
| Resident | *Catharus aurantiirostris* | 14.56 |  | 13 | 15 | Skutch 1960; Skutch 1945; Boyce and Martin 2017 |
| Resident | *Catharus gracilirostris* |  |  |  |  |  |
| Resident | *Catharus fuscater* | 15.6 |  |  |  | Beltrán and Kattan 2001; Boyce and Martin 2017 |
| Resident | *Catharus occidentalis* |  |  |  |  |  |
| Resident | *Catharus frantzii* | 15.25 |  | 15 | 16 | Skutch 1945; Skutch 1960; Collar 2019 |
| Resident | *Catharus mexicanus* |  |  |  |  |  |

|  |  | Nestling period | | | | |
| --- | --- | --- | --- | --- | --- | --- |
| Status | Species | Nestling period Avegare | Nestling period SD | Nestling period Min | Nestling period Max | Reference |
| Migratory | *Catharus bicknelli (Average)* | 11.4 | 1.3 | 10.5 | 13.5 |  |
| Migratory | *Catharus bicknelli* | 11.4 | 1.3 | 9 | 13 | Wallace 1939 |
| Migratory | *Catharus bicknelli* | NA | NA | 12 | 14 | Y. Aubry unpubl. (In Birds of North America, Rodewald 2015) |
| Migratory | *Catharus fuscescens (Average)* |  |  | 10 | 12 |  |
| Migratory | *Catharus fuscescens* |  |  | 10 | 12 | Tyler 1949 (In Birds of North America, Rodewald 2015) |
| Migratory | *Catharus fuscescens* |  |  |  |  |  |
| Migratory | *Catharus guttatus (Average)* | 12.38 |  | 10 | 15 |  |
| Migratory | *Catharus guttatus auduboni* | 12 |  | 10 | 15 | Knight 1908, Gabrielson and Lincoln 1959, PWJ nest record cards (In Birds of North America, Rodewald 2015) |
| Migratory | *Catharus guttatus sequoiensis* |  |  |  |  |  |
| Migratory | *Catharus guttatus faxoni* |  |  |  |  |  |
| Migratory | *Catharus guttatus guttatus* |  |  |  |  |  |
| Migratory | *Catharus guttatus nanus* |  |  |  |  |  |
| Migratory | *Catharus guttatus slevini* |  |  |  |  |  |
| Migratory | *Catharus guttatus polionotus* |  |  |  |  |  |
| Migratory | *Catharus minimus* |  |  | 11 | 13 |  |
| Migratory | *Catharus ustulatus* |  |  | 10 | 14 | Handbook of birds of the world, volume 10 (Collar et al. 2005) |
| Resident | *Catharus dryas* |  |  | 13 | 15 |  |
| Resident | *Catharus aurantiirostris* | 15.14 |  | 13 | 17 | Skutch 1960; Skutch 1945; Boyce and Martin 2017 |
| Resident | *Catharus gracilirostris* |  |  |  |  |  |
| Resident | *Catharus fuscater* | 15.22 |  |  |  | Beltrán and Kattan 2001; Boyce and Martin 2017 |
| Resident | *Catharus occidentalis* |  |  |  |  |  |
| Resident | *Catharus frantzii* | 15 |  | 14 | 17 | Skutch 1945; Skutch 1960 |
| Resident | *Catharus mexicanus* |  |  |  |  |  |

|  |  |  | Nest height above ground | | | | |
| --- | --- | --- | --- | --- | --- | --- | --- |
| Status | Species | Nest height above ground Average |  | Nest height above ground SD | Nest height above ground Min | Nest height above ground Max | Reference |
| Migratory | *Catharus bicknelli (Average)* |  | 205 | 118 | 46 | 100 |  |
| Migratory | *Catharus bicknelli* |  | 205 | 118 | 46 | 100 | Wallace 1939 |
| Migratory | *Catharus bicknelli* |  |  |  |  |  |  |
| Migratory | *Catharus fuscescens (Average)* |  | 33 |  | 0 | 74 |  |
| Migratory | *Catharus fuscescens* |  | 33 |  | 0 | 74 | Heckscher 2004 |
| Migratory | *Catharus fuscescens* |  |  |  |  |  |  |
| Migratory | *Catharus guttatus (Average)* |  |  |  | 25.16666667 | 455 | Boyce and Martin 2017; Jones, Peter W., and Therese M. Donovan 2012 (In Birds of North America, Rodewald  2015) Ficha 261 |
| Migratory | *Catharus guttatus auduboni* |  |  |  | 15 | 300 | Martin and Roper 1988, Bent 1949 |
| Migratory | *Catharus guttatus sequoiensis* |  |  |  | NA | NA |  |
| Migratory | *Catharus guttatus faxoni* |  |  |  | 0 | 300 | We only choose the range of PWJ |
| Migratory | *Catharus guttatus guttatus* |  |  |  | 0 |  | Grinnell 1909, Swarth 1922 |
| Migratory | *Catharus guttatus nanus* |  |  |  | 0 |  | Grinnell 1909, Bent 1949 |
| Migratory | *Catharus guttatus slevini* |  |  |  | 46 | 920 | Bailey 1902, Gabrielson and Lincoln 1959, Sheldon 1908 |
| Migratory | *Catharus guttatus polionotus* |  |  |  | 90 | 300 |  |
| Migratory | *Catharus minimus* |  | 80 | 60 | 0 | 250 | BK; see also Kessel 1989 |
| Migratory | *Catharus ustulatus* |  | 1.8 | 1 | 100 | 300 | Kessel 1998, Campbell et al. 1997, Evans et al. 1998, Eaton 1998. (WFVZ, CNRP, K. McFarland pers. Comm. In Birds of North America, Rodewald 2015) |
| Resident | *Catharus dryas* |  |  |  | 60 | 400 |  |
| Resident | *Catharus aurantiirostris* |  |  |  | 0.1 | 300 | Skutch 1960 |
| Resident | *Catharus gracilirostris* |  |  |  | 100 | 500 | Sánchez-M 2019; Collar 2019 |
| Resident | *Catharus fuscater* |  |  |  | 50 | 300 | Halley 2014; Collar 2019; Beltrán and Kattan 2001 |
| Resident | *Catharus occidentalis* |  |  |  | 0.01 |  | Collar 2019; Soberanes-González et al. 2012 |
| Resident | *Catharus frantzii* |  |  |  | 91 | 396 | Skutch 1960; Carriker 1910; Rowley 1984; Collar 2019; Taylor et al. 2011 |
| Resident | *Catharus mexicanus* |  |  |  | 100 | 300 | Collar 2019 |

**References**

Bailey, F. M. 1902. Handbook of birds of the western United States. Houghton Mifflin Co. Boston, MA.

Beltrán, W., and G. Kattan. 2001. First record of the Slaty-backed Nightingale-Thrush in the Central Andes of Colombia, with notes on its ecology and geographical variation. Wilson Bulletin 113: 134–139.

Bent, A. C. 1949. Life histories of North American thrushes, kinglets, and their allies. U.S. Natl. Mus. Bull. 196.

Boyce, A. J., & Martin, T. E. (2017). Contrasting latitudinal patterns of life‐history divergence in two genera of new world thrushes (Turdinae). Journal of avian biology, 48(4), 581-590.

Campbell, R. W., N. K. Dawe, I. McTaggart-Cowan, J. M. Cooper, and G. W. Kaiser. 1997. The birds of British Columbia, Vol. 3-Passerines: flycatchers through vireos. R. Br. Columbia Mus. Victoria.

Carriker, M. A. 1910. An annotated list of the birds of Costa Rica including Cocos Island. Annals of the Carnegie Museum 6: 314-915.

Collar, N. 2019. Thrushes (Turdidae). In: del Hoyo, J., Elliott, A., Sargatal, J., Christie, D.A. & de Juana, E. (eds.). Handbook of the Birds of the World Alive. Lynx Edicions, Barcelona. (retrieved from https://www.hbw.com/node/58368 on 8 May 2019).

Eaton, S. W. 1998. Swainson's Thrush nests in the Allegany Hills. Kingbird 48:16-18.

Evans, D. M., J. C. Bednarz, C. R. Davis, and J. C. Hovis. 1998. The effects of forest landscape modification and management on Neotropical migratory songbird populations in west-central Idaho. Unpubl. final report, December 18, 1998. Arkansas State Univ., State University.

Gabrielson, I. N. and F. C. Lincoln. 1959. The birds of Alaska. Stackpole Co. Harrisburg, PA.

Grinnell, J. 1909. Birds and Mammals of the 1907 Alexander expedition to South-eastern Alaska. Berkeley University of California Publ Zoology 5:181-244.

Halley, M. R. 2014. Slaty-backed Nightingale-Thrush (Catharus fuscater), version 1.0. In Neotropical Birds Online (T. S. Schulenberg, Editor). Cornell Lab of Ornithology, Ithaca, NY, USA. https://doi.org/10.2173/nb.sbnthr1.01

Heckscher, C. M. 2004. Veery Nest Sites in a Mid-Atlantic Piedmont Forest: Vegetative Physiognomy and Use of Alien Shrubs. Am Midland Nat 151(2):326-337.

Kessel, B. 1998. Habitat characteristics of some passerine birds in western North American taiga. Univ. of Alaska Press, Fairbanks.

Kessel, B. 1989. Birds of the Seward Peninsula, Alaska: their biogeography, seasonality, and natural history. Univ. of Alaska Press, Fairbanks.

Martin, T. E. and J. J. Roper. 1988. Nest predation and nest-site selection of a western population of Hermit Thrush. Condor 90:51-57.

Rodewald, P. 2015. The Birds of North America Online: http://bna.birds.cornell.edu/BNA/. Cornell Laboratory of Ornithology, Ithaca, NY.

Rowley, J. S. 1984. Breeding records of land birds in Oaxaca, Mexico. Proceedings of the Western Foundation of Vertebrate Zoology 2: 73-224.

Sánchez-M., C. 2009. Black-billed Nightingale-Thrush (Catharus gracilirostris), version 1.0. In Neotropical Birds Online (T. S. Schulenberg, Editor). Cornell Lab of Ornithology, Ithaca, NY, USA. https://doi.org/10.2173/nb.bbnthr1.01

Sheldon, H. H. 1908. Three nests of note from northern California. Condor 10:120-124.

Skutch, A. F. 1960. Life histories of Central American birds. II. Families Vireonidae, Sylviidae, Turdidae, Troglodytidae, Paridae, Corvidae, Hirundindiae and Tyrannidae. Pacific Coast Avifauna number 34. Cooper Ornithological Society, Berkeley, California.

Skutch, A. F. 1945. Incubation and Nesting Periods of Central American Birds. The Auk 62: 8-37.

Soberanes-González, C. A., C. I. Rodríguez-Flores, M. d. C. Arizmendi, and T. S. Schulenberg. 2012. Russet Nightingale-Thrush

(Catharus occidentalis), version 1.0. In Neotropical Birds Online (T. S. Schulenberg, Editor). Cornell Lab of Ornithology, Ithaca, NY, USA. https://doi.org/10.2173/nb.runthr1.01

Swarth, H. S. 1922. Birds and Mammals of the Stikine river region of northern British Columbia and south-eastern Alaska. University of California Publications in Zoology 24:125-314.

Taylor, J., C. A. Soberanes-González, C. I. Rodríguez-Flores, and M. d. C. Arizmendi (2011). Ruddy-capped Nightingale-Thrush (Catharus frantzii), version 1.0. In Neotropical Birds Online (T. S. Schulenberg, Editor). Cornell Lab of Ornithology, Ithaca, NY, USA.

https://doi.org/10.2173/nb.rcnthr1.01

Wallace, G. J. 1939. Bicknell's Thrush, its taxonomy, distribution, and life history. Proc. Boston Soc. Nat. Hist. 41:211-402.

Wetmore, A., Pasquier, R. F., and S. L. Olson. 1984. The Birds of the Republic of Panamá, Part 4. Passeriformes: Hirundidae (Swallows) to Fringillidae (Finches). Smithsonian Institution Press, Washington, D.C. pp. 670.
